# Supplementary material for: H+ and Pi Byproducts of Glycosylation Affect Ca2+ Homeostasis and Are Retrieved from the Golgi Complex by Homologs of TMEM165 and XPR1
Source: PubMed Central journal article supplement (PMC5714488; doi:10.1534/g3.117.300339), 2017-10-17
Supplement: 3913TableS1.pdf [file 3913TableS1.pdf]

Supplemental Table 1. Sensitivity of mutant strains to added CaCl<sub>2</sub> (experiment A)

| EXP | LINE | Strain Names |          | Genotypes and Conditions [a] |      |      |      |    |      |      | CV [b] |     | IC50 [c] |      | Performance Factor [d] |      |      |      |      |  |  |
|-----|------|--------------|----------|------------------------------|------|------|------|----|------|------|--------|-----|----------|------|------------------------|------|------|------|------|--|--|
|     |      | MATa         | MATajaha | PMC1                         | VCX1 | GDT1 | CRZ1 | CN | CMK2 | ERD1 | %      | mM  | PMC1     | VCX1 | GDT1                   | CRZ1 | CN   | CMK2 | ERD1 |  |  |
| A   | 1    | K1849        | K1850    | Δ                            |      |      |      |    |      |      | 3      | 52  |          | 0.3  | 0.2                    | -0.1 | -3.1 | -0.3 |      |  |  |
| A   | 2    | K1851        | K1852    | Δ                            |      |      | Δ    |    |      |      | 7      | 55  |          | 0.9  | 0.3                    |      | -3.2 | -0.6 |      |  |  |
| A   | 3    | K1857        | K1858    | Δ                            |      | Δ    |      |    |      |      | 0      | 46  |          | 0.6  |                        | 0.1  | -1.0 | 0.1  |      |  |  |
| A   | 4    | K1859        | K1860    | Δ                            |      | Δ    | Δ    |    |      |      | 11     | 44  |          | 0.9  |                        |      | -0.9 | -0.4 |      |  |  |
| A   | 5    | K1865        | K1866    | Δ                            | Δ    |      |      |    |      |      | 0      | 43  |          |      | 0.6                    | 0.5  | 0.3  | 0.1  |      |  |  |
| A   | 6    | K1867        | K1868    | Δ                            | Δ    |      | Δ    |    |      |      | 7      | 30  |          |      | 0.4                    |      | 0.3  | 0.4  |      |  |  |
| A   | 7    | K1873        | K1874    | Δ                            | Δ    | Δ    |      |    |      |      | 12     | 30  |          |      |                        | 0.4  | 0.6  | -0.2 |      |  |  |
| A   | 8    | K1875        | K1876    | Δ                            | Δ    | Δ    | Δ    |    |      |      | 5      | 23  |          |      |                        |      | 0.9  | 0.1  |      |  |  |
| A   | 9    | K1849        | K1850    | Δ                            |      |      |      |    | +FK  |      | 2      | 464 |          | 3.8  | 2.4                    | -0.1 |      | 0.2  |      |  |  |
| A   | 10   | K1851        | K1852    | Δ                            |      |      | Δ    |    | +FK  |      | 1      | 511 |          | 4.3  | 2.6                    |      |      | 0.6  |      |  |  |
| A   | 11   | K1857        | K1858    | Δ                            |      | Δ    |      |    | +FK  |      | 3      | 90  |          | 2.2  |                        | 0.1  |      | 0.1  |      |  |  |
| A   | 12   | K1859        | K1860    | Δ                            |      | Δ    | Δ    |    | +FK  |      | 1      | 84  |          | 2.7  |                        |      |      | 0.4  |      |  |  |
| A   | 13   | K1865        | K1866    | Δ                            | Δ    |      |      |    | +FK  |      | 9      | 34  |          |      | 0.8                    | 0.4  |      | 0.9  |      |  |  |
| A   | 14   | K1867        | K1868    | Δ                            | Δ    |      | Δ    |    | +FK  |      | 7      | 25  |          |      | 1.0                    |      |      | 1.3  |      |  |  |
| A   | 15   | K1873        | K1874    | Δ                            | Δ    | Δ    |      |    | +FK  |      | 32     | 19  |          |      |                        | 0.6  |      | 0.7  |      |  |  |
| A   | 16   | K1875        | K1876    | Δ                            | Δ    | Δ    | Δ    |    | +FK  |      | 4      | 13  |          |      |                        |      |      | 1.0  |      |  |  |
| A   | 17   | K1853        | K1854    | Δ                            |      |      |      |    |      | Δ    | 4      | 63  |          | 0.6  | 0.5                    | -0.4 | -2.7 |      |      |  |  |
| A   | 18   | K1855        | K1856    | Δ                            |      |      | Δ    |    |      | Δ    | 14     | 84  |          | 1.8  | 0.5                    |      | -2.0 |      |      |  |  |
| A   | 19   | K1861        | K1862    | Δ                            |      | Δ    |      |    |      | Δ    | 19     | 43  |          | 0.3  |                        | -0.4 | -0.9 |      |      |  |  |
| A   | 20   | K1863        | K1864    | Δ                            |      | Δ    | Δ    |    |      | Δ    | 6      | 57  |          | 1.4  |                        |      | -0.1 |      |      |  |  |
| A   | 21   | K1869        | K1870    | Δ                            | Δ    |      |      |    |      | Δ    | 2      | 41  |          |      | 0.2                    | 0.8  | 1.2  |      |      |  |  |
| A   | 22   | K1871        | K1872    | Δ                            | Δ    |      | Δ    |    |      | Δ    | 1      | 23  |          |      | 0.1                    |      | 1.2  |      |      |  |  |
| A   | 23   | K1877        | K1878    | Δ                            | Δ    | Δ    |      |    |      | Δ    | 4      | 35  |          |      |                        | 0.7  | 1.6  |      |      |  |  |
| A   | 24   | K1879        | K1880    | Δ                            | Δ    | Δ    | Δ    |    |      | Δ    | 4      | 21  |          |      |                        |      | 1.8  |      |      |  |  |
| A   | 25   | K1853        | K1854    | Δ                            |      |      |      |    | +FK  | Δ    | 0      | 403 |          | 4.5  | 2.3                    | 0.2  |      |      |      |  |  |
| A   | 26   | K1855        | K1856    | Δ                            |      |      | Δ    |    | +FK  | Δ    | 1      | 343 |          | 5.1  | 2.5                    |      |      |      |      |  |  |
| A   | 27   | K1861        | K1862    | Δ                            |      | Δ    |      |    | +FK  | Δ    | 1      | 82  |          | 2.8  |                        | 0.4  |      |      |      |  |  |
| A   | 28   | K1863        | K1864    | Δ                            |      | Δ    | Δ    |    | +FK  | Δ    | 15     | 62  |          | 3.3  |                        |      |      |      |      |  |  |
| A   | 29   | K1869        | K1870    | Δ                            | Δ    |      |      |    | +FK  | Δ    | 26     | 18  |          |      | 0.6                    | 0.8  |      |      |      |  |  |
| A   | 30   | K1871        | K1872    | Δ                            | Δ    |      | Δ    |    | +FK  | Δ    | 7      | 10  |          |      | 0.7                    |      |      |      |      |  |  |
| A   | 31   | K1877        | K1878    | Δ                            | Δ    | Δ    |      |    | +FK  | Δ    | 14     | 12  |          |      |                        | 0.9  |      |      |      |  |  |
| A   | 32   | K1879        | K1880    | Δ                            | Δ    | Δ    | Δ    |    | +FK  | Δ    | 16     | 6   |          |      |                        |      |      |      |      |  |  |
| A   | 33   | K1833        | K1834    |                              |      |      |      |    |      |      | 16     | 178 | 1.8      |      | 0.7                    | 1.1  | -1.8 | -0.1 |      |  |  |
| A   | 34   | K1835        | K1836    |                              |      |      | Δ    |    |      |      | 17     | 81  | 0.6      |      | 0.1                    |      | -2.8 | -0.5 |      |  |  |
| A   | 35   | K1841        | K1842    |                              |      | Δ    |      |    |      |      | 6      | 107 | 1.2      |      |                        | 0.5  | -0.1 | 0.0  |      |  |  |
| A   | 36   | K1843        | K1844    |                              |      | Δ    | Δ    |    |      |      | 25     | 75  | 0.8      |      |                        |      | -0.4 | -0.4 |      |  |  |
| A   | 37   | K1833        | K1834    |                              |      |      |      |    | +FK  |      | 6      | 635 | 0.5      |      | 2.5                    | 0.2  |      | 0.3  |      |  |  |
| A   | 38   | K1835        | K1836    |                              |      |      | Δ    |    | +FK  |      | 4      | 563 | 0.1      |      | 2.5                    |      |      | 0.5  |      |  |  |
| A   | 39   | K1841        | K1842    |                              |      | Δ    |      |    | +FK  |      | 9      | 113 | 0.3      |      |                        | 0.2  |      | 0.3  |      |  |  |
| A   | 40   | K1843        | K1844    |                              |      | Δ    | Δ    |    | +FK  |      | 12     | 97  | 0.2      |      |                        |      |      | 0.4  |      |  |  |
| A   | 41   | K1837        | K1838    |                              |      |      |      |    |      | Δ    | 16     | 195 | 1.6      |      | 0.9                    | 0.8  | -1.4 |      |      |  |  |
| A   | 42   | K1839        | K1840    |                              |      |      | Δ    |    |      | Δ    | 12     | 112 | 0.4      |      | 0.2                    |      | -1.8 |      |      |  |  |
| A   | 43   | K1845        | K1846    |                              |      | Δ    |      |    |      | Δ    | 29     | 103 | 1.3      |      |                        | 0.1  | 0.1  |      |      |  |  |
| A   | 44   | K1847        | K1848    |                              |      | Δ    | Δ    |    |      | Δ    | 6      | 95  | 0.7      |      |                        |      | 0.4  |      |      |  |  |
| A   | 45   | K1837        | K1838    |                              |      |      |      |    | +FK  | Δ    | 5      | 498 | 0.3      |      | 2.4                    | 0.3  |      |      |      |  |  |
| A   | 46   | K1839        | K1840    |                              |      |      | Δ    |    | +FK  | Δ    | 1      | 403 | 0.2      |      | 2.5                    |      |      |      |      |  |  |
| A   | 47   | K1845        | K1846    |                              |      | Δ    |      |    | +FK  | Δ    | 13     | 94  | 0.2      |      |                        | 0.4  |      |      |      |  |  |
| A   | 48   | K1847        | K1848    |                              |      | Δ    | Δ    |    | +FK  | Δ    | 32     | 73  | 0.2      |      |                        |      |      |      |      |  |  |

Footnotes

- [a] addition of 0.2 µg/mL FK506
- [b] coefficient of variation between two strains (in %) or one strain (\*)
- [c] normalized average of IC50 from two strains (in mM CaCl<sub>2</sub>)
- [d] PF = log base 2 of (IC50 WT strain/IC50 Δ strain)

Supplemental Table 1. Sensitivity of mutant strains to added CaCl<sub>2</sub> (experiment B)

| EXP | LINE | Strain Names |          | Genotypes and Conditions [a] |      |      |      |    |      |      | CV [b] |     | IC50 [c] |      | Performance Factor [d] |      |      |      |      |  |  |
|-----|------|--------------|----------|------------------------------|------|------|------|----|------|------|--------|-----|----------|------|------------------------|------|------|------|------|--|--|
|     |      | MATa         | MATalpha | PMC1                         | VXC1 | GDT1 | CRZ1 | CN | CMK2 | ERD1 | %      | mM  | PMC1     | VXC1 | GDT1                   | CRZ1 | CN   | CMK2 | ERD1 |  |  |
| B   | 1    | NS122        | NS123    | Δ                            |      |      |      |    |      |      | 2      | 56  |          | 0.1  | 0.0                    | -0.6 | -2.6 |      | -0.1 |  |  |
| B   | 2    | NS132        | NS133    | Δ                            |      |      | Δ    |    |      |      | 1      | 84  |          | 1.9  | 0.6                    |      | -2.1 |      | -0.1 |  |  |
| B   | 3    | NS136        | NS137    | Δ                            |      | Δ    |      |    |      |      | 4      | 57  |          | 0.8  |                        | 0.0  | -0.4 |      | -0.1 |  |  |
| B   | 4    | NS144        | NS145    | Δ                            |      | Δ    | Δ    |    |      |      | 12     | 56  |          | 1.5  |                        |      | -0.3 |      | 0.0  |  |  |
| B   | 5    | NS154        | NS155    | Δ                            | Δ    |      |      |    |      |      | 0      | 52  |          |      | 0.6                    | 1.2  | 1.1  |      | -0.1 |  |  |
| B   | 6    | NS164        | NS165    | Δ                            | Δ    |      | Δ    |    |      |      | 4      | 22  |          |      | 0.1                    |      | 0.1  |      | -0.7 |  |  |
| B   | 7    | NS168        | NS169    | Δ                            | Δ    | Δ    |      |    |      |      | 1      | 33  |          |      |                        | 0.7  | 1.3  |      | -0.2 |  |  |
| B   | 8    | NS176        | NS177    | Δ                            | Δ    | Δ    | Δ    |    |      |      | *      | 20  |          |      |                        |      | 0.7  |      | -0.2 |  |  |
| B   | 9    | NS122        | NS123    | Δ                            |      |      |      |    | +FK  |      | 1      | 348 |          | 3.9  | 2.2                    | 0.0  |      |      | 0.7  |  |  |
| B   | 10   | NS132        | NS133    | Δ                            |      |      | Δ    |    | +FK  |      | 0      | 347 |          | 4.1  | 2.3                    |      |      |      | 0.7  |  |  |
| B   | 11   | NS136        | NS137    | Δ                            |      | Δ    |      |    | +FK  |      | 5      | 73  |          | 2.4  |                        | 0.0  |      |      | 0.9  |  |  |
| B   | 12   | NS144        | NS145    | Δ                            |      | Δ    | Δ    |    | +FK  |      | 11     | 71  |          | 2.5  |                        |      |      |      | 0.9  |  |  |
| B   | 13   | NS154        | NS155    | Δ                            | Δ    |      |      |    | +FK  |      | 5      | 23  |          |      | 0.8                    | 0.2  |      |      | -0.7 |  |  |
| B   | 14   | NS164        | NS165    | Δ                            | Δ    |      | Δ    |    | +FK  |      | 6      | 20  |          |      | 0.7                    |      |      |      | -0.4 |  |  |
| B   | 15   | NS168        | NS169    | Δ                            | Δ    | Δ    |      |    | +FK  |      | 0      | 14  |          |      |                        | 0.2  |      |      | 0.0  |  |  |
| B   | 16   | NS176        | NS177    | Δ                            | Δ    | Δ    | Δ    |    | +FK  |      | *      | 12  |          |      |                        |      |      |      | 0.1  |  |  |
| B   | 17   | NS128        | NS129    | Δ                            |      |      |      |    |      | Δ    | 1      | 61  |          | 0.1  | 0.0                    | -0.5 | -1.8 |      |      |  |  |
| B   | 18   | NS138        | NS139    | Δ                            |      |      | Δ    |    |      | Δ    | 0      | 88  |          | 1.3  | 0.7                    |      | -1.3 |      |      |  |  |
| B   | 19   | NS140        | NS141    | Δ                            |      | Δ    |      |    |      | Δ    | 4      | 59  |          | 0.7  |                        | 0.1  | 0.6  |      |      |  |  |
| B   | 20   | NS146        | NS147    | Δ                            |      | Δ    | Δ    |    |      | Δ    | 1      | 56  |          | 1.3  |                        |      |      |      | 0.5  |  |  |
| B   | 21   | NS160        | NS161    | Δ                            | Δ    |      |      |    |      | Δ    | 1      | 56  |          |      | 0.6                    | 0.6  | 0.5  |      | 0.5  |  |  |
| B   | 22   | NS170        | NS171    | Δ                            | Δ    |      | Δ    |    |      | Δ    | 0      | 37  |          |      | 0.7                    |      |      |      | 0.5  |  |  |
| B   | 23   | NS172        | NS173    | Δ                            | Δ    | Δ    |      |    |      | Δ    | 8      | 37  |          |      |                        | 0.7  | 1.4  |      | 1.4  |  |  |
| B   | 24   | NS178        | NS179    | Δ                            | Δ    | Δ    | Δ    |    |      | Δ    | 6      | 23  |          |      |                        |      | 1.0  |      |      |  |  |
| B   | 25   | NS128        | NS129    | Δ                            |      |      |      |    | +FK  |      | 1      | 210 |          | 2.4  | 2.5                    | 0.0  |      |      |      |  |  |
| B   | 26   | NS138        | NS139    | Δ                            |      |      | Δ    |    | +FK  |      | 7      | 213 |          | 3.0  | 2.5                    |      |      |      |      |  |  |
| B   | 27   | NS140        | NS141    | Δ                            |      | Δ    |      |    | +FK  |      | 1      | 38  |          | 1.4  |                        | 0.0  |      |      |      |  |  |
| B   | 28   | NS146        | NS147    | Δ                            |      | Δ    | Δ    |    | +FK  |      | 1      | 38  |          | 1.7  |                        |      |      |      |      |  |  |
| B   | 29   | NS160        | NS161    | Δ                            | Δ    |      |      |    | +FK  |      | 0      | 39  |          |      | 1.5                    | 0.6  |      |      |      |  |  |
| B   | 30   | NS170        | NS171    | Δ                            | Δ    |      | Δ    |    | +FK  |      | 2      | 26  |          |      | 1.2                    |      |      |      |      |  |  |
| B   | 31   | NS172        | NS173    | Δ                            | Δ    | Δ    |      |    | +FK  |      | 16     | 14  |          |      |                        | 0.3  |      |      |      |  |  |
| B   | 32   | NS178        | NS179    | Δ                            | Δ    | Δ    | Δ    |    | +FK  |      | 8      | 12  |          |      |                        |      |      |      |      |  |  |
| B   | 33   | NS116        | NS117    |                              |      |      |      |    |      | 3    | 298    |     | 2.4      | 0.0  | 0.2                    | 1.4  | -0.3 |      | 0.1  |  |  |
| B   | 34   | NS120        | NS121    |                              |      |      | Δ    |    |      | 0    | 111    |     | 0.4      | 0.7  | 0.2                    | -1.7 |      | 0.2  |      |  |  |
| B   | 35   | NS124        | NS125    |                              |      | Δ    |      |    |      | *    | 257    |     | 2.2      | 0.4  |                        | 1.4  | 1.8  |      | 0.6  |  |  |
| B   | 36   | NS134        | NS135    |                              |      | Δ    | Δ    |    |      | 1    | 94     |     | 0.7      | 0.6  |                        | 0.0  |      | 0.6  |      |  |  |
| B   | 37   | NS148        | NS149    |                              | Δ    |      |      |    |      | 2    | 291    |     | 2.5      |      | 0.6                    | 2.1  | 1.2  |      | 0.1  |  |  |
| B   | 38   | NS152        | NS153    |                              | Δ    |      | Δ    |    |      | 8    | 68     |     | 1.6      |      | 0.1                    | -0.8 |      | 0.0  |      |  |  |
| B   | 39   | NS156        | NS157    |                              | Δ    | Δ    |      |    |      | 6    | 197    |     | 2.6      |      |                        | 1.7  | 1.6  |      | 0.1  |  |  |
| B   | 40   | NS166        | NS167    |                              | Δ    | Δ    | Δ    |    |      | 3    | 62     |     | 1.6      |      |                        | 0.4  |      | 0.1  |      |  |  |
| B   | 41   | NS116        | NS117    |                              |      |      |      |    | +FK  |      | 0      | 372 |          | 0.1  | 1.6                    | 2.3  | 0.0  |      | 0.3  |  |  |
| B   | 42   | NS120        | NS121    |                              |      |      | Δ    |    | +FK  |      | 1      | 364 |          | 0.1  | 1.6                    | 1.9  |      |      | 0.8  |  |  |
| B   | 43   | NS124        | NS125    |                              |      | Δ    |      |    | +FK  |      | *      | 76  |          | 0.1  | 0.2                    |      | -0.3 |      | 0.9  |  |  |
| B   | 44   | NS134        | NS135    |                              |      | Δ    | Δ    |    | +FK  |      | 1      | 96  |          | 0.4  | 1.1                    |      |      |      | 1.0  |  |  |
| B   | 45   | NS148        | NS149    |                              | Δ    |      |      |    | +FK  |      | 1      | 124 |          | 2.4  |                        | 0.9  | 0.0  |      | 0.1  |  |  |
| B   | 46   | NS152        | NS153    |                              | Δ    |      | Δ    |    | +FK  |      | 4      | 123 |          | 2.6  |                        | 1.4  |      |      | 0.3  |  |  |
| B   | 47   | NS156        | NS157    |                              | Δ    | Δ    |      |    | +FK  |      | 2      | 67  |          | 2.3  |                        |      | 0.5  |      | 1.2  |  |  |
| B   | 48   | NS166        | NS167    |                              | Δ    | Δ    | Δ    |    | +FK  |      | 1      | 46  |          | 1.9  |                        |      |      |      | 0.9  |  |  |
| B   | 49   | NS118        | NS119    |                              |      |      |      |    |      | Δ    | 2      | 277 |          | 2.2  | 0.0                    | 0.8  | 1.5  |      | -0.1 |  |  |
| B   | 50   | NS126        | NS127    |                              |      |      | Δ    |    |      | Δ    | 2      | 97  |          | 0.1  | 0.5                    | 0.6  |      | -1.2 |      |  |  |
| B   | 51   | NS128        | NS129    |                              |      | Δ    |      |    |      | Δ    | 2      | 164 |          | 1.5  | -0.1                   |      | 1.4  | 2.0  |      |  |  |
| B   | 52   | NS142        | NS143    |                              |      | Δ    | Δ    |    |      | Δ    | 2      | 64  |          | 0.2  | 0.1                    |      | 0.4  |      | 0.4  |  |  |
| B   | 53   | NS150        | NS151    |                              | Δ    |      |      |    |      | Δ    | 3      | 272 |          | 2.3  |                        | 0.6  | 2.0  | 1.2  |      |  |  |
| B   | 54   | NS158        | NS159    |                              | Δ    |      | Δ    |    |      | Δ    | 3      | 67  |          | 0.9  |                        | 0.2  | -0.6 |      |      |  |  |
| B   | 55   | NS162        | NS163    |                              | Δ    | Δ    |      |    |      | Δ    | *      | 178 |          | 2.3  |                        |      | 1.6  | 2.6  |      |  |  |
| B   | 56   | NS174        | NS175    |                              | Δ    | Δ    | Δ    |    |      | Δ    | 4      | 59  |          | 1.3  |                        |      | 1.3  |      |      |  |  |
| B   | 57   | NS118        | NS119    |                              |      |      |      |    | +FK  |      | 2      | 297 |          | 0.5  | 1.4                    | 2.9  | 0.5  |      |      |  |  |
| B   | 58   | NS126        | NS127    |                              |      |      | Δ    |    | +FK  |      | 4      | 215 |          | 0.0  | 1.1                    | 2.2  |      |      |      |  |  |
| B   | 59   | NS128        | NS129    |                              |      | Δ    |      |    | +FK  |      | 3      | 41  |          | 0.1  | 0.5                    |      | -0.2 |      |      |  |  |
| B   | 60   | NS142        | NS143    |                              |      | Δ    | Δ    |    | +FK  |      | 29     | 48  |          | 0.3  | 1.0                    |      |      |      |      |  |  |
| B   | 61   | NS150        | NS151    |                              | Δ    |      |      |    | +FK  |      | 1      | 115 |          | 1.6  |                        | 2.0  | 0.2  |      |      |  |  |
| B   | 62   | NS158        | NS159    |                              | Δ    |      | Δ    |    | +FK  |      | 3      | 103 |          | 2.0  |                        | 2.1  |      |      |      |  |  |
| B   | 63   | NS162        | NS163    |                              | Δ    | Δ    |      |    | +FK  |      | *      | 29  |          | 1.0  |                        |      | 0.2  |      |      |  |  |
| B   | 64   | NS174        | NS175    |                              | Δ    | Δ    | Δ    |    | +FK  |      | 9      | 25  |          | 1.1  |                        |      |      |      |      |  |  |

Footnotes

- [a] addition of 0.2 μg/mL FK506
- [b] coefficient of variation between two strains (in %) or one strain (\*)
- [c] normalized average of IC50 from two strains (in mM CaCl<sub>2</sub>)
- [d] PF = log base 2 of (IC50 WT strain/IC50 Δ strain)
