# Supplementary material for: H+ and Pi Byproducts of Glycosylation Affect Ca2+ Homeostasis and Are Retrieved from the Golgi Complex by Homologs of TMEM165 and XPR1
Source: PubMed Central journal article supplement (PMC5714488; doi:10.1534/g3.117.300339), 2017-10-17
Supplement: 3913TableS2.pdf [file 3913TableS2.pdf]

**Supplemental Table 2. List of yeast strains used in this study**

| Strain | Background | Genotype                                                                                        | Source                     |
|--------|------------|-------------------------------------------------------------------------------------------------|----------------------------|
| K601   | W303 [a]   | <i>MATa</i>                                                                                     | Cunningham and Fink (1996) |
| K605   | W303       | <i>MATa pmc1::TRP1</i>                                                                          | Cunningham and Fink (1996) |
| K661   | W303       | <i>MATa vcx1Δ</i>                                                                               | Cunningham and Fink (1996) |
| K665   | W303       | <i>MATa pmc1::TRP1 vcx1Δ</i>                                                                    | Cunningham and Fink (1996) |
| K1801  | W303       | <i>MATa</i>                                                                                     | This Study                 |
| K1802  | W303       | <i>MATa stv1::KanR</i>                                                                          | This Study                 |
| K1803  | W303       | <i>MATa vph1::NatR</i>                                                                          | This Study                 |
| K1804  | W303       | <i>MATa vph1::NatR stv1::KanR</i>                                                               | This Study                 |
| K1805  | W303       | <i>MATa gdt1::HIS3</i>                                                                          | This Study                 |
| K1806  | W303       | <i>MATa gdt1::HIS3 stv1::KanR</i>                                                               | This Study                 |
| K1807  | W303       | <i>MATa gdt1::HIS3 vph1::NatR</i>                                                               | This Study                 |
| K1808  | W303       | <i>MATa gdt1::HIS3 vph1::NatR stv1::KanR</i>                                                    | This Study                 |
| K1809  | W303       | <i>MATa vcx1Δ</i>                                                                               | This Study                 |
| K1810  | W303       | <i>MATa vcx1Δ stv1::KanR</i>                                                                    | This Study                 |
| K1811  | W303       | <i>MATa vcx1Δ vph1::NatR</i>                                                                    | This Study                 |
| K1812  | W303       | <i>MATa vcx1Δ vph1::NatR stv1::KanR</i>                                                         | This Study                 |
| K1813  | W303       | <i>MATa vcx1Δ gdt1::HIS3</i>                                                                    | This Study                 |
| K1814  | W303       | <i>MATa vcx1Δ gdt1::HIS3 stv1::KanR</i>                                                         | This Study                 |
| K1815  | W303       | <i>MATa vcx1Δ gdt1::HIS3 vph1::NatR</i>                                                         | This Study                 |
| K1816  | W303       | <i>MATa vcx1Δ gdt1::HIS3 vph1::NatR stv1::KanR</i>                                              | This Study                 |
| K1817  | W303       | <i>MATa</i>                                                                                     | This Study                 |
| K1818  | W303       | <i>MATa stv1::KanR</i>                                                                          | This Study                 |
| K1819  | W303       | <i>MATa vph1::NatR</i>                                                                          | This Study                 |
| K1820  | W303       | <i>MATa vph1::NatR stv1::KanR</i>                                                               | This Study                 |
| K1821  | W303       | <i>MATa gdt1::HIS3</i>                                                                          | This Study                 |
| K1822  | W303       | <i>MATa gdt1::HIS3 stv1::KanR</i>                                                               | This Study                 |
| K1823  | W303       | <i>MATa gdt1::HIS3 vph1::NatR</i>                                                               | This Study                 |
| K1824  | W303       | <i>MATa gdt1::HIS3 vph1::NatR stv1::KanR</i>                                                    | This Study                 |
| K1825  | W303       | <i>MATa vcx1Δ</i>                                                                               | This Study                 |
| K1826  | W303       | <i>MATa vcx1Δ stv1::KanR</i>                                                                    | This Study                 |
| K1827  | W303       | <i>MATa vcx1Δ vph1::NatR</i>                                                                    | This Study                 |
| K1828  | W303       | <i>MATa vcx1Δ vph1::NatR stv1::KanR</i>                                                         | This Study                 |
| K1829  | W303       | <i>MATa vcx1Δ gdt1::HIS3</i>                                                                    | This Study                 |
| K1830  | W303       | <i>MATa vcx1Δ gdt1::HIS3 stv1::KanR</i>                                                         | This Study                 |
| K1831  | W303       | <i>MATa vcx1Δ gdt1::HIS3 vph1::NatR</i>                                                         | This Study                 |
| K1832  | W303       | <i>MATa vcx1Δ gdt1::HIS3 vph1::NatR stv1::KanR</i>                                              | This Study                 |
| K1833  | W303       | <i>MATa</i>                                                                                     | This Study                 |
| K1834  | W303       | <i>MATa</i>                                                                                     | This Study                 |
| K1841  | W303       | <i>MATa gdt1::HIS3</i>                                                                          | This Study                 |
| K1842  | W303       | <i>MATa gdt1::HIS3</i>                                                                          | This Study                 |
| K1849  | W303       | <i>MATa pmc1::LEU2</i>                                                                          | This Study                 |
| K1850  | W303       | <i>MATa pmc1::LEU2</i>                                                                          | This Study                 |
| K1857  | W303       | <i>MATa pmc1::LEU2 gdt1::HIS3</i>                                                               | This Study                 |
| K1858  | W303       | <i>MATa pmc1::LEU2 gdt1::HIS3</i>                                                               | This Study                 |
| K1865  | W303       | <i>MATa vcx1Δ pmc1::LEU2</i>                                                                    | This Study                 |
| K1866  | W303       | <i>MATa vcx1Δ pmc1::LEU2</i>                                                                    | This Study                 |
| K1873  | W303       | <i>MATa vcx1Δ pmc1::LEU2 gdt1::HIS3</i>                                                         | This Study                 |
| K1874  | W303       | <i>MATa vcx1Δ pmc1::LEU2 gdt1::HIS3</i>                                                         | This Study                 |
| K1883  | W303       | <i>MATa vcx1Δ pmc1::TRP1 crz1::KanR</i>                                                         | This Study                 |
| CTS05  | W303       | <i>MATa</i>                                                                                     | This Study                 |
| CTS06  | W303       | <i>MATa</i>                                                                                     | This Study                 |
| CTS09  | W303       | <i>MATa gdt1::HIS3</i>                                                                          | This Study                 |
| CTS10  | W303       | <i>MATa gdt1::HIS3</i>                                                                          | This Study                 |
| CTS13  | W303       | <i>MATa pmr1::LEU2</i>                                                                          | This Study                 |
| CTS14  | W303       | <i>MATa pmr1::LEU2</i>                                                                          | This Study                 |
| CTS17  | W303       | <i>MATa pmr1::LEU2 gdt1::HIS3</i>                                                               | This Study                 |
| CTS18  | W303       | <i>MATa pmr1::LEU2 gdt1::HIS3</i>                                                               | This Study                 |
| AK011  | W303       | <i>MATa vph1::NatR</i>                                                                          | This Study                 |
| AK012  | W303       | <i>MATa pmc1::TRP1 vph1::NatR</i>                                                               | This Study                 |
| AK013  | W303       | <i>MATa pmc1::TRP1 vcx1Δ vph1::NatR</i>                                                         | This Study                 |
| AK014  | W303       | <i>MATa vcx1Δ vph1::NatR</i>                                                                    | This Study                 |
| NS001  | W303       | <i>MATa vcx1Δ</i>                                                                               | This Study                 |
| NS002  | W303       | <i>MATa vcx1Δ</i>                                                                               | This Study                 |
| NS118  | W303       | <i>MATa erd1::NatR</i>                                                                          | This Study                 |
| NS119  | W303       | <i>MATa erd1::NatR</i>                                                                          | This Study                 |
| NS185  | W303       | <i>MATa pho84::TRP1</i>                                                                         | This Study                 |
| NS186  | W303       | <i>MATa pho84::TRP1</i>                                                                         | This Study                 |
| NS187  | W303       | <i>MATa erd1::NatR pho84::TRP1</i>                                                              | This Study                 |
| NS188  | W303       | <i>MATa erd1::NatR pho84::TRP1</i>                                                              | This Study                 |
| EY916  | W303       | <i>MATa pho84Δ::HIS3 pho87Δ::CgHIS3 pho89Δ::CgHIS3 pho90Δ::CgHIS3 pho91Δ::KIURA3</i>            | Wykoff and O'Shea (2001)   |
| NS229  | W303       | <i>MATa pho84Δ::HIS3 pho87Δ::CgHIS3 pho89Δ::CgHIS3 pho90Δ::CgHIS3 pho91Δ::KIURA3 erd1::NatR</i> | This Study                 |
| TSA36  | BY4741     | <i>MATa sec1-1::KanR</i>                                                                        | Li et al. (2011)           |
| NS227  | BY4741     | <i>MATa sec1-1::KanR erd1::NatR</i>                                                             | This Study                 |
|        | BY4741     | <i>MATa VRG4-TAP-AID-6xFLAG::TIR1::URA3</i>                                                     | This Study                 |
| NS228  | BY4741     | <i>MATa VRG4-TAP-AID-6xFLAG::TIR1::URA3 erd1::NatR</i>                                          | This Study                 |

[a] background mutations in W303 (*leu2-3,112 trp1-1 can1-100 ura3-1 ade2-1 his3-11,15*)

[b] background mutations in BY4741 (*his3Δ1 leu2Δ0 met15Δ0 ura3Δ0*)
